# Supplementary material for: A gold microarray electrode on a poly(methylmethacrylate) substrate to improve the performance of microbial fuel cells by modifying biofilm formation
Source: Royal Society of Chemistry journal article supplement (doi:10.1039/c6ra22152a), 2016-01-01
Supplement: c6ra22152a1.pdf [file c6ra22152a1.pdf]

## Supporting Information

### **A gold microarray electrode on poly(methylmethacrylate) substrate to improve the performance of microbial fuel cell by modifying biofilm formation**

Shan Chen<sup>1</sup>, Xiangyu Chen<sup>1,2</sup>, Shuangyue Hou<sup>1</sup>, Penghui Xiong<sup>1</sup>, Ying Xiong<sup>1</sup>, Feng Zhang<sup>3</sup>, Hanqing Yu<sup>3</sup>, Gang Liu<sup>1</sup>, Yangchao Tian<sup>1\*</sup>

<sup>1</sup>National Synchrotron Radiation Laboratory, University of Science and Technology of China, Hefei, Anhui, 230029, People's Republic of China

<sup>2</sup>Department of Precision Machinery & Precision Instrumentation, University of Science and Technology of China, Hefei, Anhui, 230029, People's Republic of China

<sup>3</sup>Department of Chemistry, University of Science & Technology of China, Hefei, Anhui, 230029, People's Republic of China

**\* Corresponding author:**

Dr. Yangchao Tian

\*Tel.: +86 551 63601844; \*fax: +86 551 65141078.

\*E-mail: ychtian@ustc.edu.cn.

The following is included as additional supporting materials for this paper:

Page S3 **Fig. S1.** Schematic diagram of two-chamber MFCs in this paper.

Page S4 **Fig. S2.** The extended Derjaguin–Landau–Verwey–Overbeek (DLVO) model curves of bacteria-PMMA and bacteria-GLASS interaction.

Page S5 The formulas used to theoretical analysis of bacteria-PMMA and bacteria-GLASS interaction.

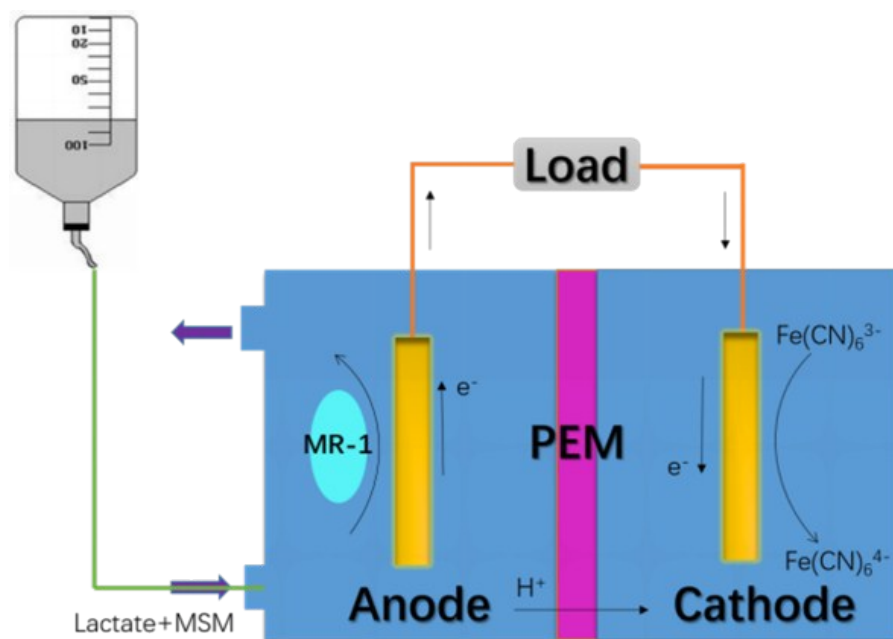

**Fig. S1.** Schematic diagram of two-chamber MFCs in this paper.

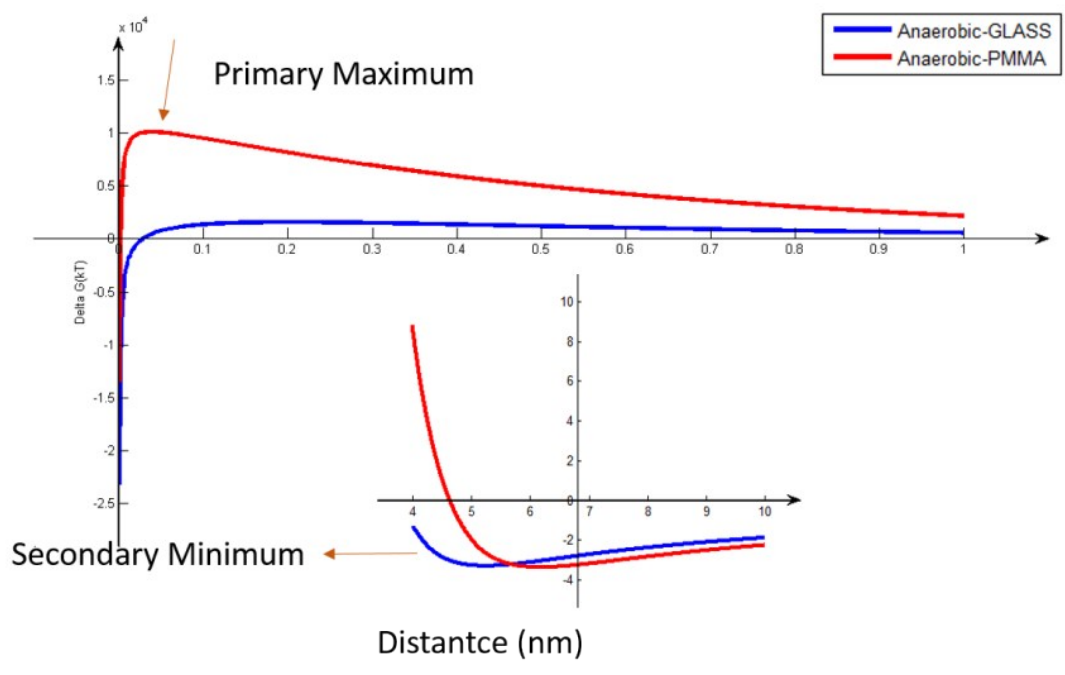

**Fig. S2.** The extended Derjaguin–Landau–Verwey–Overbeek (DLVO) model curves of bacteria-PMMA and bacteria-GLASS interaction.

**The formulas used to theoretical analysis of bacteria-PMMA and bacteria-GLASS interaction (referenced from <sup>1</sup>).**

The free energy of interactions ( $\Delta G(d)$ ) is determined by Lifshitz–van der Waals ( $\Delta G^{LW}(d)$ ), Lewis acid–base ( $\Delta G^{AB}(d)$ ), and electrostatic ( $\Delta G^{EL}(d)$ ) forces:

$$\Delta G(d) = \Delta G^{LW}(d) + \Delta G^{AB}(d) + \Delta G^{EL}(d).$$

where  $d$  indicates the distance between bacteria and a substrate and free energies are the functions of  $d$ .

And with the surface energy data,  $\Delta G^{LW}(d)$ ,  $\Delta G^{AB}(d)$ , and  $\Delta G^{EL}(d)$  are calculated as follows:

$$\Delta G^{LW}(d) = \frac{A}{6} \left[ \frac{a}{d} + \frac{a}{d+2a} + \ln \left( \frac{d}{d+2a} \right) \right]$$

$$\Delta G^{AB}(d) = 2\pi a \lambda \Delta G_{d_0}^{AB} \exp \left( -\frac{d_0 - d}{\lambda} \right)$$

$$\Delta G^{EL}(d) = \pi \varepsilon_0 \varepsilon_r a \left( \zeta_B^2 + \zeta_S^2 \right) \left\{ \frac{2\zeta_B \zeta_S}{\zeta_B^2 + \zeta_S^2} \ln \frac{1 + \exp(-\kappa d)}{1 - \exp(-\kappa d)} + \ln [1 - \exp(-2\kappa d)] \right\}$$

where  $a$  is the bacterial radius;

$A$  is the Hamaker constant;

$\lambda$  is the correlation length of molecules in a liquid medium;

$\varepsilon_0$  is the permittivity of vacuum;

$\varepsilon_r$  is the relative permittivity;

$\zeta_B$  is the zeta potential of bacteria;

$\zeta_S$  is the zeta potential of substrate;

$\kappa$  is the reciprocal of Debye length.

1. X. Ge, Y. Leng, X. Lu, F. Z. Ren, K. F. Wang, Y. H. Ding and M. Yang, *J Biomed Mater Res A*, 2015, **103**, 384-396.
